# Supplementary material
Source: PubMed Central journal article supplement (PMC4402162)
Supplement: NIHMS679965-supplement-Appendix.pdf [file NIHMS679965-supplement-Appendix.pdf]

# A Regularized Linear Dynamical System Framework for Multivariate Time Series Analysis - Supplemental Materials

Zitao Liu and Milos Hauskrecht

Computer Science Department, University of Pittsburgh, 210 South Bouquet St., Pittsburgh, PA, 15260 USA

## Notations

We use the following notations in this supplemental material. The notation is consistent with the original paper.

- $\hat{\mathbf{z}}_{t|t-1} = \mathbb{E}[\mathbf{z}_t | \{\mathbf{y}\}_1^{t-1}]$  is the *priori* estimation
- $\hat{\mathbf{z}}_{t-1|t-1} = \mathbb{E}[\mathbf{z}_{t-1} | \{\mathbf{y}\}_1^{t-1}]$  is the *posteriori* estimation.
- $P_{t|t-1} = \mathbb{E}[(\mathbf{z}_t - \hat{\mathbf{z}}_{t|t-1})(\mathbf{z}_t - \hat{\mathbf{z}}_{t|t-1})']$  is the *priori* estimate error covariance.
- $P_{t-1|t-1} = \mathbb{E}[(\mathbf{z}_{t-1} - \hat{\mathbf{z}}_{t-1|t-1})(\mathbf{z}_{t-1} - \hat{\mathbf{z}}_{t-1|t-1})']$  is the *posteriori* estimate error covariance.
- $\hat{\mathbf{z}}_{t|T} \equiv \mathbb{E}[\mathbf{z}_t | \mathbf{y}]$ ,  $M_{t|T} \equiv \mathbb{E}[\mathbf{z}_t \mathbf{z}_t' | \mathbf{y}]$ ,  $M_{t,t-1|T} \equiv \mathbb{E}[\mathbf{z}_t \mathbf{z}_{t-1}' | \mathbf{y}]$ ,  $P_{t|T} = \text{VAR}[\mathbf{z}_t | \mathbf{y}]$ , and  $P_{t,t-1|T} = \text{VAR}[\mathbf{z}_t \mathbf{z}_{t-1}' | \mathbf{y}]$

## Theorem 1 Proof

**Theorem 1.** *Generalized gradient descent with a fixed step size  $\rho \leq 1/(\|Q^{-1}\|_F \cdot \|\sum_{t=1}^{T-1} \mathbb{E}[\mathbf{z}_t \mathbf{z}_t' | \mathbf{y}]\|_F + \lambda_2)$  for minimizing eq.(7) has convergence rate  $O(1/k)$ , where  $k$  is the number of iterations.*

*Proof.*  $h(A)$  is differentiable with respect to  $A$ , and its gradient is  $\nabla h(A) = Q^{-1}(A \sum_{t=1}^{T-1} \mathbb{E}[\mathbf{z}_t \mathbf{z}_t' | \mathbf{y}] - \sum_{t=2}^T \mathbb{E}[\mathbf{z}_t \mathbf{z}_{t-1}' | \mathbf{y}]) + \lambda_2 A$ . Using simple algebraic manipulation we arrive at

$$\begin{aligned} & \|\nabla h(X) - \nabla h(Y)\|_F \\ &= \|Q^{-1}(X - Y) \sum_{t=1}^{T-1} \mathbb{E}[\mathbf{z}_t \mathbf{z}_t' | \mathbf{y}] + \lambda_2(X - Y)\|_F \\ &\leq \|Q^{-1}\|_F \cdot \left\| \sum_{t=1}^{T-1} \mathbb{E}[\mathbf{z}_t \mathbf{z}_t' | \mathbf{y}] \right\|_F \cdot \|X - Y\|_F \\ &\quad + \lambda_2 \cdot \|X - Y\|_F \\ &= (\|Q^{-1}\|_F \cdot \left\| \sum_{t=1}^{T-1} \mathbb{E}[\mathbf{z}_t \mathbf{z}_t' | \mathbf{y}] \right\|_F + \lambda_2) \cdot \|X - Y\|_F \end{aligned}$$

The inequality holds because of the sub-multiplicative property of Frobenius norm. Since we know for eq.(7),  $\min_A h(A) + \lambda_2 \|A\|_*$ , and  $h(A)$  has Lipschitz continuous gradient with constant  $\|Q^{-1}\|_F \cdot \|\sum_{t=1}^{T-1} \mathbb{E}[\mathbf{z}_t \mathbf{z}_t' | \mathbf{y}]\|_F + \lambda_2$ , according to (Shor 1968) (Fornasier 2008), we have

$$\begin{aligned} & \left\| h(A^{(k)}) + \lambda_2 \|A^{(k)}\|_* - h(A^*) - \lambda_2 \|A^*\|_* \right\| \\ & \leq \|A^{(0)} - A^*\|_F^2 / 2tk \end{aligned}$$

where  $A^{(0)}$  is the initial value and  $A^*$  is the optimal value for  $A$ ;  $k$  is the number of iterations.  $\square$

## Backward algorithm for rLDS

### Algorithm 1 EM: E-step Backward algorithm for rLDS

INPUT:

- Output from Kalman filter algorithm:  $\{\hat{\mathbf{z}}_{t|t-1}\}_{t=2}^T$ ,  $\{\hat{\mathbf{z}}_{t|t}\}_{t=1}^T$ ,  $\{P_{t|t}\}_{t=1}^T$ ,  $\{P_{t|t-1}\}_{t=2}^T$  and  $\{K_t\}_{t=1}^T$ .
- Current step LDS parameters:  $\Omega = \{A, C, Q, R, \xi, \Psi\}$ .

PROCEDURE:

- 1: // Initialize the recursion
- 2:  $M_{T|T} = P_{T|T} + \hat{\mathbf{z}}_{T|T} \hat{\mathbf{z}}_{T|T}'$
- 3:  $J_{T-1} = P_{T-1|T-1} A' (P_{T|T-1})^{-1}$
- 4:  $P_{T-1|T} = P_{T-1|T-1} + J_{T-1} (P_{T|T} - P_{T|T-1}) J_{T-1}'$
- 5:  $\hat{\mathbf{z}}_{T-1|T} = \hat{\mathbf{z}}_{T-1|T-1} + J_{T-1} (\hat{\mathbf{z}}_{T|T} - A \hat{\mathbf{z}}_{T-1|T-1})$
- 6:  $P_{T,T-1|T} = (I - K_T C) A P_{T-1|T-1}$
- 7:  $M_{T,T-1|T} = P_{T,T-1|T} + \hat{\mathbf{z}}_{T|T} \hat{\mathbf{z}}_{T-1|T}'$
- 8: // Start the recursion
- 9: **for**  $t = T-1 \rightarrow 1$  **do**
- 10:  $M_{t|T} = P_{t|T} + \hat{\mathbf{z}}_{t|T} \hat{\mathbf{z}}_{t|T}'$
- 11:  $J_{t-1} = P_{t-1|t-1} A' (P_{t|t-1})^{-1}$
- 12:  $P_{t,t-1|T} = P_{t|t} J_{t-1}' + J_t (P_{t+1,t|T} - A P_{t|t}) J_{t-1}'$
- 13:  $M_{t,t-1|T} = P_{t,t-1|T} + \hat{\mathbf{z}}_{t|T} \hat{\mathbf{z}}_{t-1|T}'$
- 14:  $\hat{\mathbf{z}}_{t-1|T} = \hat{\mathbf{z}}_{t-1|t-1} + J_{t-1} (\hat{\mathbf{z}}_{t|T} - A \hat{\mathbf{z}}_{t-1|t-1})$
- 15:  $P_{t-1|T} = P_{t-1|t-1} + J_{t-1} (P_{t|T} - P_{t|t-1}) J_{t-1}'$
- 16: **end for**

OUTPUT:  $\{\hat{\mathbf{z}}_{t-1|T}\}_{t=1}^T$ ,  $\{M_{t|T}\}_{t=1}^T$  and  $\{M_{t,t-1|T}\}_{t=1}^T$ .

## Transformation from eq.(4) to eq.(5).

We will use the following rules to show the mathematical transformation from eq.(4) to eq.(5).

- $Q^{-1} = LL'$  ( $Q$  is a PSD matrix)
- $tr(A_k \times_l B_l \times_m C_m \times_n) = \text{vec}(A')'(I_k \otimes B) \text{vec}(C)$
- $\text{vec}(A_k \times_l B_l \times_m) = (B' \otimes I_k) \text{vec}(A)$

By using the above rules, we can have

$$\begin{aligned}
& \arg \min_A \frac{1}{2} \sum_{t=2}^T \mathbb{E}_{\mathbf{z}} [(\mathbf{z}_t - A\mathbf{z}_{t-1})' Q^{-1} (\mathbf{z}_t - A\mathbf{z}_{t-1})] + \frac{\lambda_3}{2} \|A\|_F^2 \\
\Leftrightarrow & \arg \min_A \frac{1}{2} \sum_{t=2}^T \mathbb{E}_{\mathbf{z}} [\mathbf{z}'_{t-1} A' L L' A \mathbf{z}_{t-1}] - \frac{1}{2} \sum_{t=2}^T \mathbb{E}_{\mathbf{z}} [\mathbf{z}'_{t-1} A' L L' \mathbf{z}_t] \\
& - \frac{1}{2} \sum_{t=2}^T \mathbb{E}_{\mathbf{z}} [\mathbf{z}'_t L L' A \mathbf{z}_{t-1}] + \frac{\lambda_3}{2} \|A\|_F^2 \\
\Leftrightarrow & \arg \min_A \frac{1}{2} \sum_{t=2}^T \mathbb{E}_{\mathbf{z}} \left[ \text{Tr}[L' A \mathbf{z}_{t-1} \mathbf{z}'_{t-1} A' L] \right] + \frac{\lambda_3}{2} \|A\|_F^2 \\
& - \sum_{t=2}^T \mathbb{E}_{\mathbf{z}} \left[ \text{Tr}[L' \mathbf{z}_t \mathbf{z}'_{t-1} A' L] \right] \\
\Leftrightarrow & \arg \min_A \frac{1}{2} \sum_{t=2}^T \text{Tr} \left[ L' A (\mathbb{E}_{\mathbf{z}} [\mathbf{z}_{t-1} \mathbf{z}'_{t-1}]) A' L \right] + \frac{\lambda_3}{2} \|A\|_F^2 \\
& - \sum_{t=2}^T \text{Tr} \left[ L' (\mathbb{E}_{\mathbf{z}} [\mathbf{z}_t \mathbf{z}'_{t-1}]) A' L \right] \\
\Leftrightarrow & \arg \min_A \frac{1}{2} \text{Tr} \left[ L' A \underbrace{\left( \sum_{t=2}^T \mathbb{E}_{\mathbf{z}} [\mathbf{z}_{t-1} \mathbf{z}'_{t-1}] \right)}_B A' L \right] + \frac{\lambda_3}{2} \text{Tr} [A' A] \\
& - \text{Tr} \left[ L' \underbrace{\left( \sum_{t=2}^T \mathbb{E}_{\mathbf{z}} [\mathbf{z}_t \mathbf{z}'_{t-1}] \right)}_D A' L \right] \\
\Leftrightarrow & \arg \min_A \frac{1}{2} \text{Tr} \left[ L' A B A' L - 2 L' D A' L + \lambda_3 A' A \right] \\
\Leftrightarrow & \arg \min_A 0.5 \text{vec}(A' L)' (I_d \otimes B) \text{vec}(A' L) \\
& - \text{vec}(L)' (I_d \otimes D) \text{vec}(A' L) + 0.5 \lambda_3 \text{vec}(A')' \text{vec}(A') \\
\Leftrightarrow & \arg \min_A 0.5 \text{vec}(A')' (Q^{-1} \otimes \sum_{t=2}^T \mathbb{E}_{\mathbf{z}} [\mathbf{z}_{t-1} \mathbf{z}'_{t-1}] + \lambda_3 I_{d^2}) \text{vec}(A') \\
& - \text{vec}(L)' (L' \otimes \sum_{t=2}^T \mathbb{E}_{\mathbf{z}} [\mathbf{z}_t \mathbf{z}'_{t-1}]) \text{vec}(A')
\end{aligned}$$

## Kalman filter algorithm for rLDS

### Algorithm 2 Kalman filter algorithm for rLDS

INPUT: Current step LDS parameters:  $\Omega = \{A, C, Q, R, \xi, \Psi\}$ .  
PROCEDURE:

- 1: // Initialize the recursion
- 2:  $\hat{\mathbf{z}}_{1|1} = \xi$  and  $P_{1|1} = \Psi$ .
- 3: // Start the recursion
- 4: **for**  $t = 2 \rightarrow T$  **do**
- 5:   // Time Update:
- 6:    $\hat{\mathbf{z}}_{t|t-1} = A \hat{\mathbf{z}}_{t-1|t-1}$
- 7:    $P_{t|t-1} = A P_{t-1|t-1} A' + Q$
- 8:   // Measure Update:
- 9:    $K_t = P_{t|t-1} C' (C P_{t|t-1} C' + R)^{-1}$
- 10:    $\hat{\mathbf{z}}_{t|t} = \hat{\mathbf{z}}_{t|t-1} + K_t (\mathbf{y}_t - C \hat{\mathbf{z}}_{t|t-1})$
- 11:    $P_{t|t} = P_{t|t-1} - K_t C P_{t|t-1}$
- 12: **end for**

OUTPUT:  $\{\hat{\mathbf{z}}_{t|t-1}\}_{t=2}^T$ ,  $\{\hat{\mathbf{z}}_{t|t}\}_{t=1}^T$ ,  $\{P_{t|t}\}_{t=1}^T$ ,  $\{P_{t|t-1}\}_{t=2}^T$  and  $\{K_t\}_{t=1}^T$ .

## Production and Billing Data Results

In *Production and Billing* data, we increase the training size to 90 and use the rest 10 observations for testing. The prediction results are shown in Table 1.

Table 1: Average-MAPE results on *Production and Billing* dataset with 90 training and 10 testing.

| # of hidden states    | 2             | 3             | 4             | 5             | 6             | 7             | 8             |
|-----------------------|---------------|---------------|---------------|---------------|---------------|---------------|---------------|
| EM                    | 4.8707        | 5.9996        | 5.2047        | 4.7732        | 4.4478        | 5.3245        | 4.6278        |
| SubspaceID            | 4.7880        | 5.5328        | 6.9020        | 6.0295        | 4.5284        | 5.5099        | 5.2205        |
| StableLDS             | 4.9024        | 5.4111        | 6.4988        | 6.0295        | 4.5323        | 5.5099        | 5.2205        |
| rLDS $_{\mathcal{G}}$ | 4.7880        | 5.5328        | 6.9020        | 6.0295        | 4.5284        | 5.5099        | 5.2205        |
| rLDS $_{\mathcal{R}}$ | <b>4.5521</b> | <b>4.9543</b> | <b>5.1984</b> | <b>4.5455</b> | <b>4.4150</b> | <b>4.2961</b> | <b>3.8780</b> |
| # of hidden states    | 10            | 12            | 14            | 16            | 18            | 20            | 30            |
| EM                    | 5.2038        | 5.1908        | 3.5408        | 4.2521        | 4.0159        | 4.1269        | 3.8743        |
| SubspaceID            | 5.2182        | 5.1707        | 5.7206        | 5.0139        | 4.1461        | 4.7801        | 3.7662        |
| StableLDS             | 5.2182        | 5.1707        | 5.7206        | 5.0139        | 4.1461        | 4.7801        | 3.7662        |
| rLDS $_{\mathcal{G}}$ | 5.2182        | 5.1707        | 5.7206        | 5.0139        | 4.1461        | 4.7800        | 3.7662        |
| rLDS $_{\mathcal{R}}$ | <b>3.9218</b> | <b>4.0061</b> | <b>3.4484</b> | <b>3.7843</b> | <b>3.2868</b> | <b>3.8535</b> | <b>3.5554</b> |
